# Supplementary material
Source: PubMed Central journal article supplement (PMC1166591)

**A** Mock NCTC11637 wt NCTC11637 $\Delta$ cagA NCTC11637 $\Delta$ virB11 P1 wt P1 $\Delta$ cagA P1 $\Delta$ virB11 P310 wt P310 $\Delta$ cagA P310 $\Delta$ virB11 2808 wt 2808 $\Delta$ cagA 2808 $\Delta$ virB11

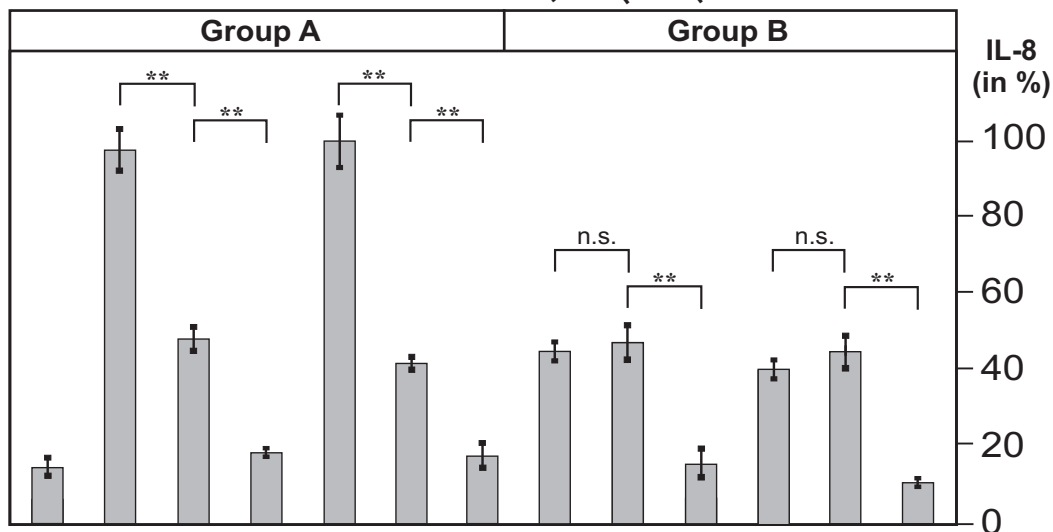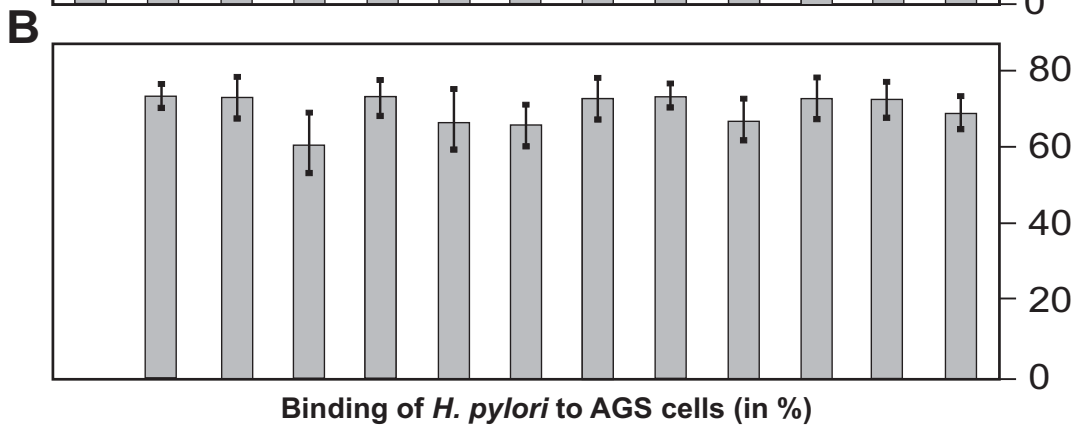

Supplement: pnas_0409873102_2.pdf [file pnas_0409873102_2.pdf]
