# Supplementary material
Source: PubMed Central journal article supplement (PMC1166591)

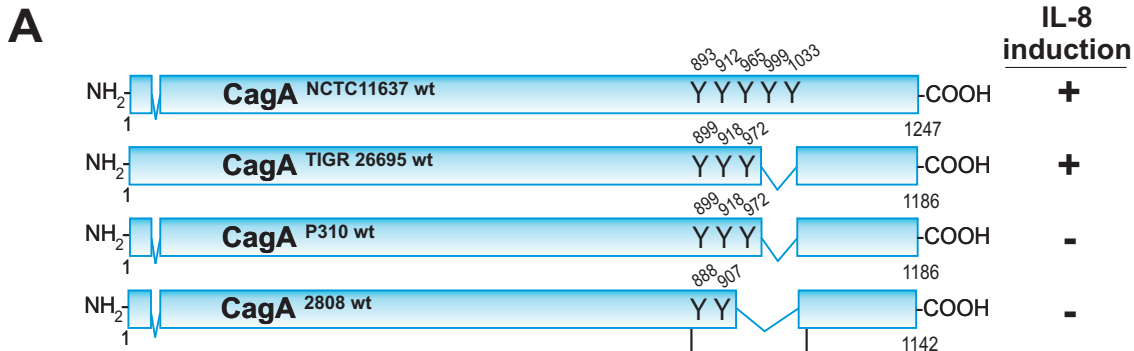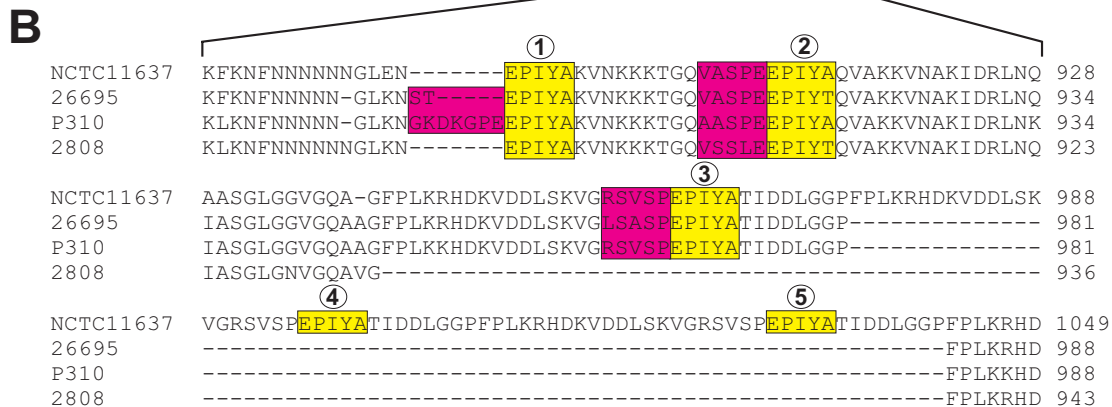

Supplement: pnas_0409873102_1.pdf [file pnas_0409873102_1.pdf]
